# Supplementary material for: Homoheteroaromaticity: the case study of azepine and dibenzazepineElectronic supplementary information (ESI) available: absolute chemical shieldings calculated at the B3LYP/6-311++G**//B3LYP/6-311++G** computational level for compounds 1b, 2b, 4b and 5b. See http://www.rsc.org/suppdata/ob/b3/b314742h/
Source: Royal Society of Chemistry journal article supplement (doi:10.1039/b314742h), 2004-01-01
Supplement: b314742h.pdf [file b314742h.pdf]

## Supplementary Information

**Org. Biomol. Chem., 2004, DOI: 10.1039/b314742h.**

### **Homoheteroaromaticity: the case study of azepine and dibenzazepine**

Christophe Dardonville,<sup>\*</sup> María Luisa Jimeno, Ibon Alkorta and José Elguero

Absolute chemical shieldings calculated at the B3LYP/6-311++G\*\*//B3LYP/6-311++G\*\* computational level.

|                                                                                                       |                                                                                                                                                                                                                                                                                                                                                                                                                                                                                                                                                                                                                                                                                                                                                                                                                                                                                                                                                                                                                                                                                                                                   |     |          |     |         |     |         |     |         |     |         |     |         |     |         |     |         |     |         |      |         |      |         |      |         |      |         |      |         |      |         |      |         |      |         |      |         |      |         |      |         |      |         |      |         |      |         |      |         |      |         |      |         |      |         |
|-------------------------------------------------------------------------------------------------------|-----------------------------------------------------------------------------------------------------------------------------------------------------------------------------------------------------------------------------------------------------------------------------------------------------------------------------------------------------------------------------------------------------------------------------------------------------------------------------------------------------------------------------------------------------------------------------------------------------------------------------------------------------------------------------------------------------------------------------------------------------------------------------------------------------------------------------------------------------------------------------------------------------------------------------------------------------------------------------------------------------------------------------------------------------------------------------------------------------------------------------------|-----|----------|-----|---------|-----|---------|-----|---------|-----|---------|-----|---------|-----|---------|-----|---------|-----|---------|------|---------|------|---------|------|---------|------|---------|------|---------|------|---------|------|---------|------|---------|------|---------|------|---------|------|---------|------|---------|------|---------|------|---------|------|---------|------|---------|------|---------|------|---------|
| <p><b>1b</b></p> 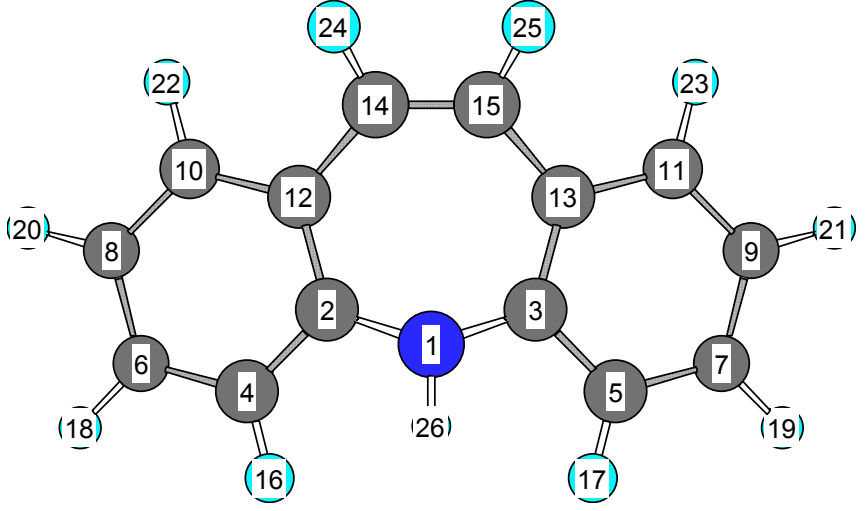   | <table border="0"> <tbody> <tr><td>1 N</td><td>139.9911</td></tr> <tr><td>2 C</td><td>25.5706</td></tr> <tr><td>3 C</td><td>25.5706</td></tr> <tr><td>4 C</td><td>60.6005</td></tr> <tr><td>5 C</td><td>60.6005</td></tr> <tr><td>6 C</td><td>48.4259</td></tr> <tr><td>7 C</td><td>48.4259</td></tr> <tr><td>8 C</td><td>55.6413</td></tr> <tr><td>9 C</td><td>55.6413</td></tr> <tr><td>10 C</td><td>47.5294</td></tr> <tr><td>11 C</td><td>47.5294</td></tr> <tr><td>12 C</td><td>44.8308</td></tr> <tr><td>13 C</td><td>44.8308</td></tr> <tr><td>14 C</td><td>43.4719</td></tr> <tr><td>15 C</td><td>43.4719</td></tr> <tr><td>16 H</td><td>25.5574</td></tr> <tr><td>17 H</td><td>25.5574</td></tr> <tr><td>18 H</td><td>24.8187</td></tr> <tr><td>19 H</td><td>24.8187</td></tr> <tr><td>20 H</td><td>25.1462</td></tr> <tr><td>21 H</td><td>25.1462</td></tr> <tr><td>22 H</td><td>25.1441</td></tr> <tr><td>23 H</td><td>25.1441</td></tr> <tr><td>24 H</td><td>25.6739</td></tr> <tr><td>25 H</td><td>25.6739</td></tr> <tr><td>26 H</td><td>27.5952</td></tr> </tbody> </table>                                        | 1 N | 139.9911 | 2 C | 25.5706 | 3 C | 25.5706 | 4 C | 60.6005 | 5 C | 60.6005 | 6 C | 48.4259 | 7 C | 48.4259 | 8 C | 55.6413 | 9 C | 55.6413 | 10 C | 47.5294 | 11 C | 47.5294 | 12 C | 44.8308 | 13 C | 44.8308 | 14 C | 43.4719 | 15 C | 43.4719 | 16 H | 25.5574 | 17 H | 25.5574 | 18 H | 24.8187 | 19 H | 24.8187 | 20 H | 25.1462 | 21 H | 25.1462 | 22 H | 25.1441 | 23 H | 25.1441 | 24 H | 25.6739 | 25 H | 25.6739 | 26 H | 27.5952 |      |         |
| 1 N                                                                                                   | 139.9911                                                                                                                                                                                                                                                                                                                                                                                                                                                                                                                                                                                                                                                                                                                                                                                                                                                                                                                                                                                                                                                                                                                          |     |          |     |         |     |         |     |         |     |         |     |         |     |         |     |         |     |         |      |         |      |         |      |         |      |         |      |         |      |         |      |         |      |         |      |         |      |         |      |         |      |         |      |         |      |         |      |         |      |         |      |         |      |         |
| 2 C                                                                                                   | 25.5706                                                                                                                                                                                                                                                                                                                                                                                                                                                                                                                                                                                                                                                                                                                                                                                                                                                                                                                                                                                                                                                                                                                           |     |          |     |         |     |         |     |         |     |         |     |         |     |         |     |         |     |         |      |         |      |         |      |         |      |         |      |         |      |         |      |         |      |         |      |         |      |         |      |         |      |         |      |         |      |         |      |         |      |         |      |         |      |         |
| 3 C                                                                                                   | 25.5706                                                                                                                                                                                                                                                                                                                                                                                                                                                                                                                                                                                                                                                                                                                                                                                                                                                                                                                                                                                                                                                                                                                           |     |          |     |         |     |         |     |         |     |         |     |         |     |         |     |         |     |         |      |         |      |         |      |         |      |         |      |         |      |         |      |         |      |         |      |         |      |         |      |         |      |         |      |         |      |         |      |         |      |         |      |         |      |         |
| 4 C                                                                                                   | 60.6005                                                                                                                                                                                                                                                                                                                                                                                                                                                                                                                                                                                                                                                                                                                                                                                                                                                                                                                                                                                                                                                                                                                           |     |          |     |         |     |         |     |         |     |         |     |         |     |         |     |         |     |         |      |         |      |         |      |         |      |         |      |         |      |         |      |         |      |         |      |         |      |         |      |         |      |         |      |         |      |         |      |         |      |         |      |         |      |         |
| 5 C                                                                                                   | 60.6005                                                                                                                                                                                                                                                                                                                                                                                                                                                                                                                                                                                                                                                                                                                                                                                                                                                                                                                                                                                                                                                                                                                           |     |          |     |         |     |         |     |         |     |         |     |         |     |         |     |         |     |         |      |         |      |         |      |         |      |         |      |         |      |         |      |         |      |         |      |         |      |         |      |         |      |         |      |         |      |         |      |         |      |         |      |         |      |         |
| 6 C                                                                                                   | 48.4259                                                                                                                                                                                                                                                                                                                                                                                                                                                                                                                                                                                                                                                                                                                                                                                                                                                                                                                                                                                                                                                                                                                           |     |          |     |         |     |         |     |         |     |         |     |         |     |         |     |         |     |         |      |         |      |         |      |         |      |         |      |         |      |         |      |         |      |         |      |         |      |         |      |         |      |         |      |         |      |         |      |         |      |         |      |         |      |         |
| 7 C                                                                                                   | 48.4259                                                                                                                                                                                                                                                                                                                                                                                                                                                                                                                                                                                                                                                                                                                                                                                                                                                                                                                                                                                                                                                                                                                           |     |          |     |         |     |         |     |         |     |         |     |         |     |         |     |         |     |         |      |         |      |         |      |         |      |         |      |         |      |         |      |         |      |         |      |         |      |         |      |         |      |         |      |         |      |         |      |         |      |         |      |         |      |         |
| 8 C                                                                                                   | 55.6413                                                                                                                                                                                                                                                                                                                                                                                                                                                                                                                                                                                                                                                                                                                                                                                                                                                                                                                                                                                                                                                                                                                           |     |          |     |         |     |         |     |         |     |         |     |         |     |         |     |         |     |         |      |         |      |         |      |         |      |         |      |         |      |         |      |         |      |         |      |         |      |         |      |         |      |         |      |         |      |         |      |         |      |         |      |         |      |         |
| 9 C                                                                                                   | 55.6413                                                                                                                                                                                                                                                                                                                                                                                                                                                                                                                                                                                                                                                                                                                                                                                                                                                                                                                                                                                                                                                                                                                           |     |          |     |         |     |         |     |         |     |         |     |         |     |         |     |         |     |         |      |         |      |         |      |         |      |         |      |         |      |         |      |         |      |         |      |         |      |         |      |         |      |         |      |         |      |         |      |         |      |         |      |         |      |         |
| 10 C                                                                                                  | 47.5294                                                                                                                                                                                                                                                                                                                                                                                                                                                                                                                                                                                                                                                                                                                                                                                                                                                                                                                                                                                                                                                                                                                           |     |          |     |         |     |         |     |         |     |         |     |         |     |         |     |         |     |         |      |         |      |         |      |         |      |         |      |         |      |         |      |         |      |         |      |         |      |         |      |         |      |         |      |         |      |         |      |         |      |         |      |         |      |         |
| 11 C                                                                                                  | 47.5294                                                                                                                                                                                                                                                                                                                                                                                                                                                                                                                                                                                                                                                                                                                                                                                                                                                                                                                                                                                                                                                                                                                           |     |          |     |         |     |         |     |         |     |         |     |         |     |         |     |         |     |         |      |         |      |         |      |         |      |         |      |         |      |         |      |         |      |         |      |         |      |         |      |         |      |         |      |         |      |         |      |         |      |         |      |         |      |         |
| 12 C                                                                                                  | 44.8308                                                                                                                                                                                                                                                                                                                                                                                                                                                                                                                                                                                                                                                                                                                                                                                                                                                                                                                                                                                                                                                                                                                           |     |          |     |         |     |         |     |         |     |         |     |         |     |         |     |         |     |         |      |         |      |         |      |         |      |         |      |         |      |         |      |         |      |         |      |         |      |         |      |         |      |         |      |         |      |         |      |         |      |         |      |         |      |         |
| 13 C                                                                                                  | 44.8308                                                                                                                                                                                                                                                                                                                                                                                                                                                                                                                                                                                                                                                                                                                                                                                                                                                                                                                                                                                                                                                                                                                           |     |          |     |         |     |         |     |         |     |         |     |         |     |         |     |         |     |         |      |         |      |         |      |         |      |         |      |         |      |         |      |         |      |         |      |         |      |         |      |         |      |         |      |         |      |         |      |         |      |         |      |         |      |         |
| 14 C                                                                                                  | 43.4719                                                                                                                                                                                                                                                                                                                                                                                                                                                                                                                                                                                                                                                                                                                                                                                                                                                                                                                                                                                                                                                                                                                           |     |          |     |         |     |         |     |         |     |         |     |         |     |         |     |         |     |         |      |         |      |         |      |         |      |         |      |         |      |         |      |         |      |         |      |         |      |         |      |         |      |         |      |         |      |         |      |         |      |         |      |         |      |         |
| 15 C                                                                                                  | 43.4719                                                                                                                                                                                                                                                                                                                                                                                                                                                                                                                                                                                                                                                                                                                                                                                                                                                                                                                                                                                                                                                                                                                           |     |          |     |         |     |         |     |         |     |         |     |         |     |         |     |         |     |         |      |         |      |         |      |         |      |         |      |         |      |         |      |         |      |         |      |         |      |         |      |         |      |         |      |         |      |         |      |         |      |         |      |         |      |         |
| 16 H                                                                                                  | 25.5574                                                                                                                                                                                                                                                                                                                                                                                                                                                                                                                                                                                                                                                                                                                                                                                                                                                                                                                                                                                                                                                                                                                           |     |          |     |         |     |         |     |         |     |         |     |         |     |         |     |         |     |         |      |         |      |         |      |         |      |         |      |         |      |         |      |         |      |         |      |         |      |         |      |         |      |         |      |         |      |         |      |         |      |         |      |         |      |         |
| 17 H                                                                                                  | 25.5574                                                                                                                                                                                                                                                                                                                                                                                                                                                                                                                                                                                                                                                                                                                                                                                                                                                                                                                                                                                                                                                                                                                           |     |          |     |         |     |         |     |         |     |         |     |         |     |         |     |         |     |         |      |         |      |         |      |         |      |         |      |         |      |         |      |         |      |         |      |         |      |         |      |         |      |         |      |         |      |         |      |         |      |         |      |         |      |         |
| 18 H                                                                                                  | 24.8187                                                                                                                                                                                                                                                                                                                                                                                                                                                                                                                                                                                                                                                                                                                                                                                                                                                                                                                                                                                                                                                                                                                           |     |          |     |         |     |         |     |         |     |         |     |         |     |         |     |         |     |         |      |         |      |         |      |         |      |         |      |         |      |         |      |         |      |         |      |         |      |         |      |         |      |         |      |         |      |         |      |         |      |         |      |         |      |         |
| 19 H                                                                                                  | 24.8187                                                                                                                                                                                                                                                                                                                                                                                                                                                                                                                                                                                                                                                                                                                                                                                                                                                                                                                                                                                                                                                                                                                           |     |          |     |         |     |         |     |         |     |         |     |         |     |         |     |         |     |         |      |         |      |         |      |         |      |         |      |         |      |         |      |         |      |         |      |         |      |         |      |         |      |         |      |         |      |         |      |         |      |         |      |         |      |         |
| 20 H                                                                                                  | 25.1462                                                                                                                                                                                                                                                                                                                                                                                                                                                                                                                                                                                                                                                                                                                                                                                                                                                                                                                                                                                                                                                                                                                           |     |          |     |         |     |         |     |         |     |         |     |         |     |         |     |         |     |         |      |         |      |         |      |         |      |         |      |         |      |         |      |         |      |         |      |         |      |         |      |         |      |         |      |         |      |         |      |         |      |         |      |         |      |         |
| 21 H                                                                                                  | 25.1462                                                                                                                                                                                                                                                                                                                                                                                                                                                                                                                                                                                                                                                                                                                                                                                                                                                                                                                                                                                                                                                                                                                           |     |          |     |         |     |         |     |         |     |         |     |         |     |         |     |         |     |         |      |         |      |         |      |         |      |         |      |         |      |         |      |         |      |         |      |         |      |         |      |         |      |         |      |         |      |         |      |         |      |         |      |         |      |         |
| 22 H                                                                                                  | 25.1441                                                                                                                                                                                                                                                                                                                                                                                                                                                                                                                                                                                                                                                                                                                                                                                                                                                                                                                                                                                                                                                                                                                           |     |          |     |         |     |         |     |         |     |         |     |         |     |         |     |         |     |         |      |         |      |         |      |         |      |         |      |         |      |         |      |         |      |         |      |         |      |         |      |         |      |         |      |         |      |         |      |         |      |         |      |         |      |         |
| 23 H                                                                                                  | 25.1441                                                                                                                                                                                                                                                                                                                                                                                                                                                                                                                                                                                                                                                                                                                                                                                                                                                                                                                                                                                                                                                                                                                           |     |          |     |         |     |         |     |         |     |         |     |         |     |         |     |         |     |         |      |         |      |         |      |         |      |         |      |         |      |         |      |         |      |         |      |         |      |         |      |         |      |         |      |         |      |         |      |         |      |         |      |         |      |         |
| 24 H                                                                                                  | 25.6739                                                                                                                                                                                                                                                                                                                                                                                                                                                                                                                                                                                                                                                                                                                                                                                                                                                                                                                                                                                                                                                                                                                           |     |          |     |         |     |         |     |         |     |         |     |         |     |         |     |         |     |         |      |         |      |         |      |         |      |         |      |         |      |         |      |         |      |         |      |         |      |         |      |         |      |         |      |         |      |         |      |         |      |         |      |         |      |         |
| 25 H                                                                                                  | 25.6739                                                                                                                                                                                                                                                                                                                                                                                                                                                                                                                                                                                                                                                                                                                                                                                                                                                                                                                                                                                                                                                                                                                           |     |          |     |         |     |         |     |         |     |         |     |         |     |         |     |         |     |         |      |         |      |         |      |         |      |         |      |         |      |         |      |         |      |         |      |         |      |         |      |         |      |         |      |         |      |         |      |         |      |         |      |         |      |         |
| 26 H                                                                                                  | 27.5952                                                                                                                                                                                                                                                                                                                                                                                                                                                                                                                                                                                                                                                                                                                                                                                                                                                                                                                                                                                                                                                                                                                           |     |          |     |         |     |         |     |         |     |         |     |         |     |         |     |         |     |         |      |         |      |         |      |         |      |         |      |         |      |         |      |         |      |         |      |         |      |         |      |         |      |         |      |         |      |         |      |         |      |         |      |         |      |         |
| <p><b>2b</b></p>  | <table border="0"> <tbody> <tr><td>1 N</td><td>159.4998</td></tr> <tr><td>2 C</td><td>46.5896</td></tr> <tr><td>3 C</td><td>46.5896</td></tr> <tr><td>4 C</td><td>59.9973</td></tr> <tr><td>5 C</td><td>59.9973</td></tr> <tr><td>6 C</td><td>44.4458</td></tr> <tr><td>7 C</td><td>44.4458</td></tr> <tr><td>8 C</td><td>42.4961</td></tr> <tr><td>9 C</td><td>42.4961</td></tr> <tr><td>10 C</td><td>45.0996</td></tr> <tr><td>11 C</td><td>45.0996</td></tr> <tr><td>12 C</td><td>47.8642</td></tr> <tr><td>13 C</td><td>47.8642</td></tr> <tr><td>14 C</td><td>45.1847</td></tr> <tr><td>15 C</td><td>45.1847</td></tr> <tr><td>16 H</td><td>24.4058</td></tr> <tr><td>17 H</td><td>24.4058</td></tr> <tr><td>18 H</td><td>23.8286</td></tr> <tr><td>19 H</td><td>23.8286</td></tr> <tr><td>20 H</td><td>23.7152</td></tr> <tr><td>21 H</td><td>23.7152</td></tr> <tr><td>22 H</td><td>23.9149</td></tr> <tr><td>23 H</td><td>23.9149</td></tr> <tr><td>24 H</td><td>24.1256</td></tr> <tr><td>25 H</td><td>24.1256</td></tr> <tr><td>26 H</td><td>25.1122</td></tr> <tr><td>27 H</td><td>25.0472</td></tr> </tbody> </table> | 1 N | 159.4998 | 2 C | 46.5896 | 3 C | 46.5896 | 4 C | 59.9973 | 5 C | 59.9973 | 6 C | 44.4458 | 7 C | 44.4458 | 8 C | 42.4961 | 9 C | 42.4961 | 10 C | 45.0996 | 11 C | 45.0996 | 12 C | 47.8642 | 13 C | 47.8642 | 14 C | 45.1847 | 15 C | 45.1847 | 16 H | 24.4058 | 17 H | 24.4058 | 18 H | 23.8286 | 19 H | 23.8286 | 20 H | 23.7152 | 21 H | 23.7152 | 22 H | 23.9149 | 23 H | 23.9149 | 24 H | 24.1256 | 25 H | 24.1256 | 26 H | 25.1122 | 27 H | 25.0472 |
| 1 N                                                                                                   | 159.4998                                                                                                                                                                                                                                                                                                                                                                                                                                                                                                                                                                                                                                                                                                                                                                                                                                                                                                                                                                                                                                                                                                                          |     |          |     |         |     |         |     |         |     |         |     |         |     |         |     |         |     |         |      |         |      |         |      |         |      |         |      |         |      |         |      |         |      |         |      |         |      |         |      |         |      |         |      |         |      |         |      |         |      |         |      |         |      |         |
| 2 C                                                                                                   | 46.5896                                                                                                                                                                                                                                                                                                                                                                                                                                                                                                                                                                                                                                                                                                                                                                                                                                                                                                                                                                                                                                                                                                                           |     |          |     |         |     |         |     |         |     |         |     |         |     |         |     |         |     |         |      |         |      |         |      |         |      |         |      |         |      |         |      |         |      |         |      |         |      |         |      |         |      |         |      |         |      |         |      |         |      |         |      |         |      |         |
| 3 C                                                                                                   | 46.5896                                                                                                                                                                                                                                                                                                                                                                                                                                                                                                                                                                                                                                                                                                                                                                                                                                                                                                                                                                                                                                                                                                                           |     |          |     |         |     |         |     |         |     |         |     |         |     |         |     |         |     |         |      |         |      |         |      |         |      |         |      |         |      |         |      |         |      |         |      |         |      |         |      |         |      |         |      |         |      |         |      |         |      |         |      |         |      |         |
| 4 C                                                                                                   | 59.9973                                                                                                                                                                                                                                                                                                                                                                                                                                                                                                                                                                                                                                                                                                                                                                                                                                                                                                                                                                                                                                                                                                                           |     |          |     |         |     |         |     |         |     |         |     |         |     |         |     |         |     |         |      |         |      |         |      |         |      |         |      |         |      |         |      |         |      |         |      |         |      |         |      |         |      |         |      |         |      |         |      |         |      |         |      |         |      |         |
| 5 C                                                                                                   | 59.9973                                                                                                                                                                                                                                                                                                                                                                                                                                                                                                                                                                                                                                                                                                                                                                                                                                                                                                                                                                                                                                                                                                                           |     |          |     |         |     |         |     |         |     |         |     |         |     |         |     |         |     |         |      |         |      |         |      |         |      |         |      |         |      |         |      |         |      |         |      |         |      |         |      |         |      |         |      |         |      |         |      |         |      |         |      |         |      |         |
| 6 C                                                                                                   | 44.4458                                                                                                                                                                                                                                                                                                                                                                                                                                                                                                                                                                                                                                                                                                                                                                                                                                                                                                                                                                                                                                                                                                                           |     |          |     |         |     |         |     |         |     |         |     |         |     |         |     |         |     |         |      |         |      |         |      |         |      |         |      |         |      |         |      |         |      |         |      |         |      |         |      |         |      |         |      |         |      |         |      |         |      |         |      |         |      |         |
| 7 C                                                                                                   | 44.4458                                                                                                                                                                                                                                                                                                                                                                                                                                                                                                                                                                                                                                                                                                                                                                                                                                                                                                                                                                                                                                                                                                                           |     |          |     |         |     |         |     |         |     |         |     |         |     |         |     |         |     |         |      |         |      |         |      |         |      |         |      |         |      |         |      |         |      |         |      |         |      |         |      |         |      |         |      |         |      |         |      |         |      |         |      |         |      |         |
| 8 C                                                                                                   | 42.4961                                                                                                                                                                                                                                                                                                                                                                                                                                                                                                                                                                                                                                                                                                                                                                                                                                                                                                                                                                                                                                                                                                                           |     |          |     |         |     |         |     |         |     |         |     |         |     |         |     |         |     |         |      |         |      |         |      |         |      |         |      |         |      |         |      |         |      |         |      |         |      |         |      |         |      |         |      |         |      |         |      |         |      |         |      |         |      |         |
| 9 C                                                                                                   | 42.4961                                                                                                                                                                                                                                                                                                                                                                                                                                                                                                                                                                                                                                                                                                                                                                                                                                                                                                                                                                                                                                                                                                                           |     |          |     |         |     |         |     |         |     |         |     |         |     |         |     |         |     |         |      |         |      |         |      |         |      |         |      |         |      |         |      |         |      |         |      |         |      |         |      |         |      |         |      |         |      |         |      |         |      |         |      |         |      |         |
| 10 C                                                                                                  | 45.0996                                                                                                                                                                                                                                                                                                                                                                                                                                                                                                                                                                                                                                                                                                                                                                                                                                                                                                                                                                                                                                                                                                                           |     |          |     |         |     |         |     |         |     |         |     |         |     |         |     |         |     |         |      |         |      |         |      |         |      |         |      |         |      |         |      |         |      |         |      |         |      |         |      |         |      |         |      |         |      |         |      |         |      |         |      |         |      |         |
| 11 C                                                                                                  | 45.0996                                                                                                                                                                                                                                                                                                                                                                                                                                                                                                                                                                                                                                                                                                                                                                                                                                                                                                                                                                                                                                                                                                                           |     |          |     |         |     |         |     |         |     |         |     |         |     |         |     |         |     |         |      |         |      |         |      |         |      |         |      |         |      |         |      |         |      |         |      |         |      |         |      |         |      |         |      |         |      |         |      |         |      |         |      |         |      |         |
| 12 C                                                                                                  | 47.8642                                                                                                                                                                                                                                                                                                                                                                                                                                                                                                                                                                                                                                                                                                                                                                                                                                                                                                                                                                                                                                                                                                                           |     |          |     |         |     |         |     |         |     |         |     |         |     |         |     |         |     |         |      |         |      |         |      |         |      |         |      |         |      |         |      |         |      |         |      |         |      |         |      |         |      |         |      |         |      |         |      |         |      |         |      |         |      |         |
| 13 C                                                                                                  | 47.8642                                                                                                                                                                                                                                                                                                                                                                                                                                                                                                                                                                                                                                                                                                                                                                                                                                                                                                                                                                                                                                                                                                                           |     |          |     |         |     |         |     |         |     |         |     |         |     |         |     |         |     |         |      |         |      |         |      |         |      |         |      |         |      |         |      |         |      |         |      |         |      |         |      |         |      |         |      |         |      |         |      |         |      |         |      |         |      |         |
| 14 C                                                                                                  | 45.1847                                                                                                                                                                                                                                                                                                                                                                                                                                                                                                                                                                                                                                                                                                                                                                                                                                                                                                                                                                                                                                                                                                                           |     |          |     |         |     |         |     |         |     |         |     |         |     |         |     |         |     |         |      |         |      |         |      |         |      |         |      |         |      |         |      |         |      |         |      |         |      |         |      |         |      |         |      |         |      |         |      |         |      |         |      |         |      |         |
| 15 C                                                                                                  | 45.1847                                                                                                                                                                                                                                                                                                                                                                                                                                                                                                                                                                                                                                                                                                                                                                                                                                                                                                                                                                                                                                                                                                                           |     |          |     |         |     |         |     |         |     |         |     |         |     |         |     |         |     |         |      |         |      |         |      |         |      |         |      |         |      |         |      |         |      |         |      |         |      |         |      |         |      |         |      |         |      |         |      |         |      |         |      |         |      |         |
| 16 H                                                                                                  | 24.4058                                                                                                                                                                                                                                                                                                                                                                                                                                                                                                                                                                                                                                                                                                                                                                                                                                                                                                                                                                                                                                                                                                                           |     |          |     |         |     |         |     |         |     |         |     |         |     |         |     |         |     |         |      |         |      |         |      |         |      |         |      |         |      |         |      |         |      |         |      |         |      |         |      |         |      |         |      |         |      |         |      |         |      |         |      |         |      |         |
| 17 H                                                                                                  | 24.4058                                                                                                                                                                                                                                                                                                                                                                                                                                                                                                                                                                                                                                                                                                                                                                                                                                                                                                                                                                                                                                                                                                                           |     |          |     |         |     |         |     |         |     |         |     |         |     |         |     |         |     |         |      |         |      |         |      |         |      |         |      |         |      |         |      |         |      |         |      |         |      |         |      |         |      |         |      |         |      |         |      |         |      |         |      |         |      |         |
| 18 H                                                                                                  | 23.8286                                                                                                                                                                                                                                                                                                                                                                                                                                                                                                                                                                                                                                                                                                                                                                                                                                                                                                                                                                                                                                                                                                                           |     |          |     |         |     |         |     |         |     |         |     |         |     |         |     |         |     |         |      |         |      |         |      |         |      |         |      |         |      |         |      |         |      |         |      |         |      |         |      |         |      |         |      |         |      |         |      |         |      |         |      |         |      |         |
| 19 H                                                                                                  | 23.8286                                                                                                                                                                                                                                                                                                                                                                                                                                                                                                                                                                                                                                                                                                                                                                                                                                                                                                                                                                                                                                                                                                                           |     |          |     |         |     |         |     |         |     |         |     |         |     |         |     |         |     |         |      |         |      |         |      |         |      |         |      |         |      |         |      |         |      |         |      |         |      |         |      |         |      |         |      |         |      |         |      |         |      |         |      |         |      |         |
| 20 H                                                                                                  | 23.7152                                                                                                                                                                                                                                                                                                                                                                                                                                                                                                                                                                                                                                                                                                                                                                                                                                                                                                                                                                                                                                                                                                                           |     |          |     |         |     |         |     |         |     |         |     |         |     |         |     |         |     |         |      |         |      |         |      |         |      |         |      |         |      |         |      |         |      |         |      |         |      |         |      |         |      |         |      |         |      |         |      |         |      |         |      |         |      |         |
| 21 H                                                                                                  | 23.7152                                                                                                                                                                                                                                                                                                                                                                                                                                                                                                                                                                                                                                                                                                                                                                                                                                                                                                                                                                                                                                                                                                                           |     |          |     |         |     |         |     |         |     |         |     |         |     |         |     |         |     |         |      |         |      |         |      |         |      |         |      |         |      |         |      |         |      |         |      |         |      |         |      |         |      |         |      |         |      |         |      |         |      |         |      |         |      |         |
| 22 H                                                                                                  | 23.9149                                                                                                                                                                                                                                                                                                                                                                                                                                                                                                                                                                                                                                                                                                                                                                                                                                                                                                                                                                                                                                                                                                                           |     |          |     |         |     |         |     |         |     |         |     |         |     |         |     |         |     |         |      |         |      |         |      |         |      |         |      |         |      |         |      |         |      |         |      |         |      |         |      |         |      |         |      |         |      |         |      |         |      |         |      |         |      |         |
| 23 H                                                                                                  | 23.9149                                                                                                                                                                                                                                                                                                                                                                                                                                                                                                                                                                                                                                                                                                                                                                                                                                                                                                                                                                                                                                                                                                                           |     |          |     |         |     |         |     |         |     |         |     |         |     |         |     |         |     |         |      |         |      |         |      |         |      |         |      |         |      |         |      |         |      |         |      |         |      |         |      |         |      |         |      |         |      |         |      |         |      |         |      |         |      |         |
| 24 H                                                                                                  | 24.1256                                                                                                                                                                                                                                                                                                                                                                                                                                                                                                                                                                                                                                                                                                                                                                                                                                                                                                                                                                                                                                                                                                                           |     |          |     |         |     |         |     |         |     |         |     |         |     |         |     |         |     |         |      |         |      |         |      |         |      |         |      |         |      |         |      |         |      |         |      |         |      |         |      |         |      |         |      |         |      |         |      |         |      |         |      |         |      |         |
| 25 H                                                                                                  | 24.1256                                                                                                                                                                                                                                                                                                                                                                                                                                                                                                                                                                                                                                                                                                                                                                                                                                                                                                                                                                                                                                                                                                                           |     |          |     |         |     |         |     |         |     |         |     |         |     |         |     |         |     |         |      |         |      |         |      |         |      |         |      |         |      |         |      |         |      |         |      |         |      |         |      |         |      |         |      |         |      |         |      |         |      |         |      |         |      |         |
| 26 H                                                                                                  | 25.1122                                                                                                                                                                                                                                                                                                                                                                                                                                                                                                                                                                                                                                                                                                                                                                                                                                                                                                                                                                                                                                                                                                                           |     |          |     |         |     |         |     |         |     |         |     |         |     |         |     |         |     |         |      |         |      |         |      |         |      |         |      |         |      |         |      |         |      |         |      |         |      |         |      |         |      |         |      |         |      |         |      |         |      |         |      |         |      |         |
| 27 H                                                                                                  | 25.0472                                                                                                                                                                                                                                                                                                                                                                                                                                                                                                                                                                                                                                                                                                                                                                                                                                                                                                                                                                                                                                                                                                                           |     |          |     |         |     |         |     |         |     |         |     |         |     |         |     |         |     |         |      |         |      |         |      |         |      |         |      |         |      |         |      |         |      |         |      |         |      |         |      |         |      |         |      |         |      |         |      |         |      |         |      |         |      |         |

4b

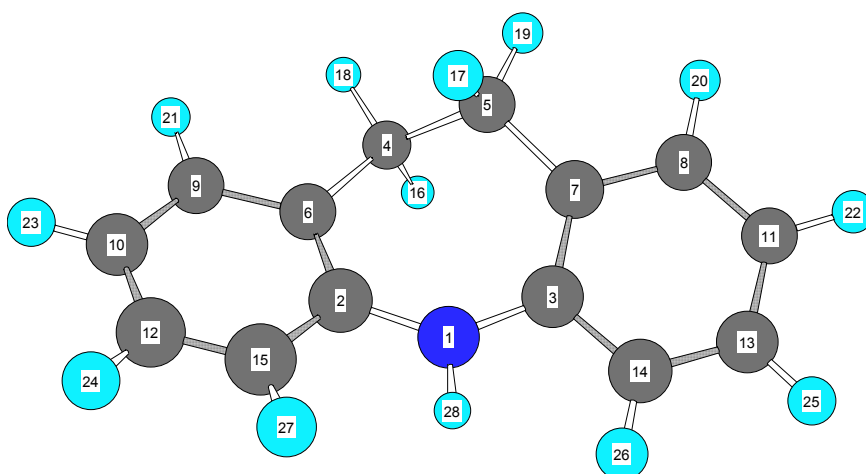

|      |          |
|------|----------|
| 1 N  | 130.7880 |
| 2 C  | 34.8775  |
| 3 C  | 34.8775  |
| 4 C  | 142.0752 |
| 5 C  | 142.0752 |
| 6 C  | 49.0496  |
| 7 C  | 49.0496  |
| 8 C  | 46.7218  |
| 9 C  | 46.7218  |
| 10 C | 60.0214  |
| 11 C | 60.0214  |
| 12 C | 50.8476  |
| 13 C | 50.8476  |
| 14 C | 62.0090  |
| 15 C | 62.0090  |
| 16 H | 28.8818  |
| 17 H | 28.8818  |
| 18 H | 28.9436  |
| 19 H | 28.9436  |
| 20 H | 24.7939  |
| 21 H | 24.7939  |
| 22 H | 25.1661  |
| 23 H | 25.1661  |
| 24 H | 24.7550  |
| 25 H | 24.7550  |
| 26 H | 25.2478  |
| 27 H | 25.2478  |
| 28 H | 26.1839  |

5b

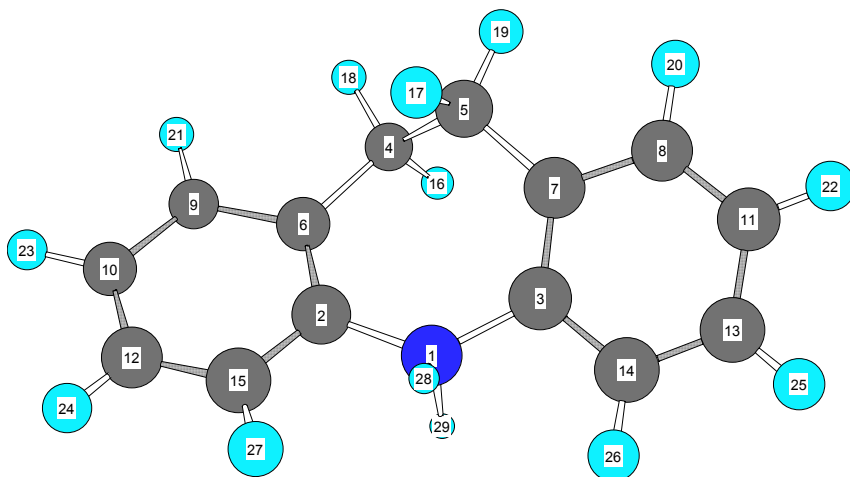

|      |          |
|------|----------|
| 1 N  | 160.8214 |
| 2 C  | 44.4769  |
| 3 C  | 41.8193  |
| 4 C  | 148.9060 |
| 5 C  | 150.6228 |
| 6 C  | 43.2850  |
| 7 C  | 42.6780  |
| 8 C  | 44.6917  |
| 9 C  | 41.4101  |
| 10 C | 42.1744  |
| 11 C | 41.3884  |
| 12 C | 47.3789  |
| 13 C | 46.4752  |
| 14 C | 59.0792  |
| 15 C | 57.6056  |
| 16 H | 28.5725  |
| 17 H | 28.5060  |
| 18 H | 28.3664  |
| 19 H | 28.5645  |
| 20 H | 23.9507  |
| 21 H | 24.1138  |
| 22 H | 23.8049  |
| 23 H | 23.8037  |
| 24 H | 24.1356  |
| 25 H | 24.0888  |
| 26 H | 24.4143  |
| 27 H | 24.7359  |
| 28 H | 23.4908  |
| 29 H | 25.7190  |
